# Supplementary material for: Diagnosis of functional strictures in patients with primary sclerosing cholangitis using hepatobiliary contrast-enhanced MRI: a proof-of-concept study
Source: Springer Nature journal article supplement (doi:10.1007/s00330-023-09915-3), 2023-07-20
Supplement: MOESM1 [file 25826036]

## Diagnosis of Functional Strictures in Patients with Primary Sclerosing Cholangitis Using Hepatobiliary Contrast-enhanced MRI: A Proof-of-Concept Study

### ELECTRONIC SUPPLEMENTARY MATERIAL

**Table 1S:** Association between T1-MRC, and T2-MRCP diagnosis, clinical scores and adverse events.

| Imaging Modality                      | Scoring method                         | No Event   | Event      | Comparison                                                    | p-value*         |
|---------------------------------------|----------------------------------------|------------|------------|---------------------------------------------------------------|------------------|
| <b>T1-MRC</b>                         | No functional stricture (NFS)          | 74 (85.1%) | 13 (14.9%) | NFS vs. PFS                                                   | <b>&lt;0.001</b> |
|                                       | Potential functional stricture (PFS)   | 0 (0%)     | 42 (100%)  |                                                               |                  |
| <b>T2-MRCP</b>                        | No dominant stricture (NDS)            | 33 (70.7%) | 13 (28.3%) | No vs. Dominant Stricture                                     | <b>0.021</b>     |
|                                       | Dominant stricture (DS)                | 41 (49.4%) | 42 (50.6%) |                                                               |                  |
| <b>T2-MRCP</b>                        | No High-grade Stricture (NHGS)         | 60 (69.0%) | 27 (31.0%) | No High-grade stricture < 75% vs. high-grade stricture ≥ 75%) | <b>&lt;0.001</b> |
|                                       | HGS                                    | 14 (33.3%) | 28 (66.7%) |                                                               |                  |
| <b>Spleen volume<sup>1</sup></b>      | Normal (≤ 381.1 cm <sup>3</sup> )      | 58 (71.6%) | 23 (28.4%) | Normal vs. splenomegaly                                       | <b>&lt;0.001</b> |
|                                       | Splenomegaly (>381.1 cm <sup>3</sup> ) | 14 (31.1%) | 31 (68.9%) |                                                               |                  |
| <b>Revised Mayo Risk Score (RMRS)</b> | Low risk                               | 62 (77.5%) | 18 (22.5%) | Low vs. intermediate and high risk                            | <b>&lt;0.001</b> |
|                                       | Intermediate risk                      | 12 (32.4%) | 25 (67.6%) |                                                               |                  |
|                                       | High risk                              | 0 (0%)     | 12 (100%)  |                                                               |                  |
| <b>ALBI Grade</b>                     | 1                                      | 65 (73.0%) | 24 (27.0%) | 1 vs. 2 and 3                                                 | <b>&lt;0.001</b> |
|                                       | 2                                      | 9 (27.3%)  | 24 (72.7%) |                                                               |                  |
|                                       | 3                                      | 0 (0%)     | 7 (100%)   |                                                               |                  |
| <b>APRI Score</b>                     | ≤ 1.17                                 | 68 (64.8%) | 37 (35.2%) | ≤ 1.17 vs. > 1.17                                             | <b>&lt;0.001</b> |
|                                       | > 1.17                                 | 6 (25.0%)  | 18 (75.0%) |                                                               |                  |
| <b>FIB-4 Index</b>                    | ≤ 1.3                                  | 59 (70.2%) | 25 (29.8%) | ≤ 1.3 vs. > 1.3                                               | <b>&lt;0.001</b> |
|                                       | > 1.3                                  | 15 (33.3%) | 30 (66.7%) |                                                               |                  |

|                                                         |                          |            |            |                                               |                  |
|---------------------------------------------------------|--------------------------|------------|------------|-----------------------------------------------|------------------|
| <b>Risk group of Amsterdam-Oxford model<sup>2</sup></b> | Low risk                 | 28 (77.8%) | 8 (22.2%)  | Low to intermediate vs. moderate to high risk | <b>&lt;0.001</b> |
|                                                         | Low to intermediate risk | 23 (76.6%) | 7 (23.3%)  |                                               |                  |
|                                                         | Moderate risk            | 17 (48.6%) | 18 (51.4%) |                                               |                  |
|                                                         | High risk                | 6 (21.4%)  | 22 (78.6%) |                                               |                  |

\* Chi-square tests comparing in a 2x2 cross-table.

1 Three patients underwent splenectomy

2 Missing laboratory parameters for one patient

**Table 2S** MRI protocol

| Sequences                                                                                       | Slice orientation | Matrix <sup>1</sup> | Voxel mm     | FOV <sup>1</sup> mm | SL <sup>1</sup> mm | gap mm | TR ms | TE ms | FA Degree | Time s |
|-------------------------------------------------------------------------------------------------|-------------------|---------------------|--------------|---------------------|--------------------|--------|-------|-------|-----------|--------|
| GRE T1 (2D flash) in-phase                                                                      | Axial             | 320x320             | 0.5x0.5x5    | 350                 | 5                  | 1      | 130   | 2.38  | 70        | 21     |
| GRE T1 (2D flash) opposed phase                                                                 | Axial             | 320x320             | 0.5x0.5x5    | 350                 | 5                  | 1      | 130   | 4.85  | 70        | 21     |
| 2D T2-MRCP breath-hold thick slab                                                               | Radial            | 384x384             | 1.0x1.0x0.45 | 380                 | 55                 | 0.5    | 5500  | 454   | 180       | 7x6    |
| 3D T2-MRCP respiratory-triggered                                                                | Coronal           | 384x384             | 0.9x0.9x0.9  | 350                 | 0.9                | 0      | 4500  | 700   | 90        | 228    |
| T1 VIBE Fat Sat unenhanced and gadoteric-enhanced (arterial, portal-venous, 5 min/transitional) | Axial             | 512x384             | 1.1x1.1x2.5  | 350                 | 2                  | 0.5    | 2.6   | 0.92  | 13        | 16x3   |
| T1 VIBE portal-venous                                                                           | Coronal           | 232x256             | 2.0x2.0x2.0  | 500                 | 2                  | 20%    | 2.6   | 0.92  | 13        | 16     |
| DWI TSE-EP/ADC                                                                                  | Axial             | 384x288             | 1.8x1.8x5    | 350                 | 5                  | 1      | 5100  | 67    | 90        | 133    |
| T2 HASTE with fatsat                                                                            | Axial             | 320x320             | 1.1x1.1x5    | 350                 | 5                  | 1      | 1800  | 150   | 150       | 21x2   |
| T2 HASTE                                                                                        | Coronal           | 512x512             | 0.5x0.5x1.2  | 380                 | 4                  | 0      | 1200  | 78    | 150       | 228    |
| T1 VIBE Fat Sat 20 Min post contrast (HBP)                                                      | Axial             | 512x384             | 1.1x1.1x2.5  | 350                 | 2                  | 0.5    | 2.6   | 0.92  | 13        | 16     |
| T1 VIBE Fat Sat 20 Min post contrast (HBP)                                                      | Coronal           | 384x384             | 1.3x1.3x2.2  | 380                 | 2                  | 0.44   | 3.59  | 1.4   | 20        | 16     |
| 2D SE-EPI MRE                                                                                   | Axial             | 100x100             | 1.6x1.6x8    | 420                 | 8                  | 0.25   | 1000  | 45    | 90        | 15     |

<sup>1</sup>Average FOV, matrix and slice thickness as these vary with patient size

VIBE = volume interpolated breath-hold examination

DWI TSE-EP/ADC= diffusion-weighted imaging Turbo spin echo-Echo planar/ Apparent diffusion coefficient

HASTE = The half-Fourier single-shot turbo spin-echo

2D SE-EPI MRE = 2D echo planar imaging (GRE) and 2D spin echo imaging

**Table 3S:** Inter-reader agreement for all readers including experts and novices, i.e., residents (3-5 years) (N=6), below for experts only (N=3) (>10 years) using Fleiss' kappa statistics.

| MR features                                                            | Fleiss-Kappa | 95% CI       | Agreement all (n=6) Readers    |
|------------------------------------------------------------------------|--------------|--------------|--------------------------------|
| <b>T2-MRCP Dominant Stricture</b>                                      | 0.22         | 0.17 – 0.27  | fair                           |
| <b>T2-MRCP High-Grade Stricture</b>                                    | 0.58         | 0.47 - 0.66  | moderate                       |
| <b>T1-MRC NFS vs. PFS on HBP</b>                                       | 0.76         | 0.71 – 0.80  | substantial                    |
| <b>Region of stricture on T2-MRCP</b><br>None/RHD/LHD/CHD (hilum) /CBD | 0.14         | 0.12 - 0.16  | poor                           |
| <b>Region of stricture on T1-MRC</b><br>None/RHD/LHD/CHD (hilum) /CBD  | 0.68         | 0.61 - 0.77  | substantial                    |
| <b>Bile duct changes on T2-MRCP</b><br>None/RHD/LHD/CHD (hilum) /CBD   | 0.57         | 0.41 - 0.66  | moderate                       |
| <b>Presence of liver cirrhosis - Yes/No</b>                            | 0.67         | 0.62 - 0.72  | substantial                    |
| <b>Splenomegaly - Yes/No</b>                                           | 0.63         | 0.52 - 0.74  | substantial                    |
| <b>Portosystemic Shunts - Yes/No</b>                                   | 0.71         | 0.67– 0.79   | substantial                    |
| MR features                                                            | Fleiss-Kappa | 95% CI       | Agreement expert (n=3) Readers |
| <b>T2-MRCP Dominant Stricture</b>                                      | 0.08         | -0.02 – 0.19 | poor                           |
| <b>T2-MRCP High-Grade Stricture</b>                                    | 0.52         | 0.37 – 0.67  | moderate                       |
| <b>T1-MRC NFS vs. PFS on HBP</b>                                       | 0.83         | 0.72 - 0.94  | almost perfect                 |
| <b>Region of stricture on T2-MRCP</b><br>None/RHD/LHD/CHD (hilum) /CBD | 0.04         | 0.04 - 0.05  | poor                           |
| <b>Region of stricture on HBP</b><br>None/RHD/LHD/CHD (hilum) /CBD     | 0.88         | 0.61 - 0.91  | almost perfect                 |
| <b>Bile duct changes on T2-MRCP</b><br>None/RHD/LHD/CHD (hilum) /CBD.  | 0.69         | 0.45 - 0.72  | substantial                    |
| <b>T1-MRC stratification into: NFS, FS, HD</b>                         | 0.89         | 0.81 - 0.97  | almost perfect                 |
| <b>Presence of liver cirrhosis -Yes/No</b>                             | 0.81         | 0.61 - 0.88  | almost perfect                 |
| <b>Splenomegaly - Yes/No</b>                                           | 0.87         | 0.78 - 0.97  | almost perfect                 |
| <b>Portosystemic Shunts - Yes/No</b>                                   | 0.83         | 0.66 - 0.86  | almost perfect                 |

The **kappa statistic:** Values < 0 as indicating poor and 0.00–0.20 as slight, 0.21–0.40 as fair, 0.41– 0.60 as moderate, 0.61–0.80 as substantial, and 0.81–1.00 as almost perfect agreement.

**Reader (N) = number of the readers.**

CBD=common bile duct, CHD= common hepatic duct, RHD=right hepatic duct, LHD=left hepatic duct, NFS=no functional stricture, PFS=potential functional stricture, HD= hepatic dysfunction,

**Table 4S:** Diagnostic or endoscopic retrograde cholangiopancreatography (ERCP)-guided treatments within 3 months from MR imaging

|                               | <b>Method</b>                    | <b>Potential Functional Stricture on T1-MRC</b> | <b>Dominant stricture on T2-MRCP</b> | <b>High-Grade Stricture on T2-MRCP</b> |
|-------------------------------|----------------------------------|-------------------------------------------------|--------------------------------------|----------------------------------------|
| <b>All ERCP</b>               | <b>Sensitivity</b>               | 94%                                             | 83%                                  | 57%                                    |
|                               | <b>Specificity</b>               | 90%                                             | 43%                                  | 77%                                    |
|                               | <b>Positive Predictive Value</b> | 79%                                             | 35%                                  | 48%                                    |
|                               | <b>Negative Predictive Value</b> | 98%                                             | 87%                                  | 83%                                    |
|                               | <b>Accuracy</b>                  | 91%                                             | 53%                                  | 71%                                    |
| <b>ERCP-guided treatments</b> | <b>Sensitivity</b>               | 100%                                            | 81%                                  | 58%                                    |
|                               | <b>Specificity</b>               | 89%                                             | 41%                                  | 76%                                    |
|                               | <b>Positive Predictive Value</b> | 74%                                             | 30%                                  | 43%                                    |
|                               | <b>Negative Predictive Value</b> | 100%                                            | 87%                                  | 85%                                    |
|                               | <b>Accuracy</b>                  | 91%                                             | 50%                                  | 71%                                    |
